# Supplementary material for: The Plasmodium falciparum cytoplasmic translation apparatus: a promising therapeutic target not yet exploited by clinically approved anti-malarials
Source: Springer Nature journal article supplement (doi:10.1186/s12936-018-2616-7), 2018-12-01

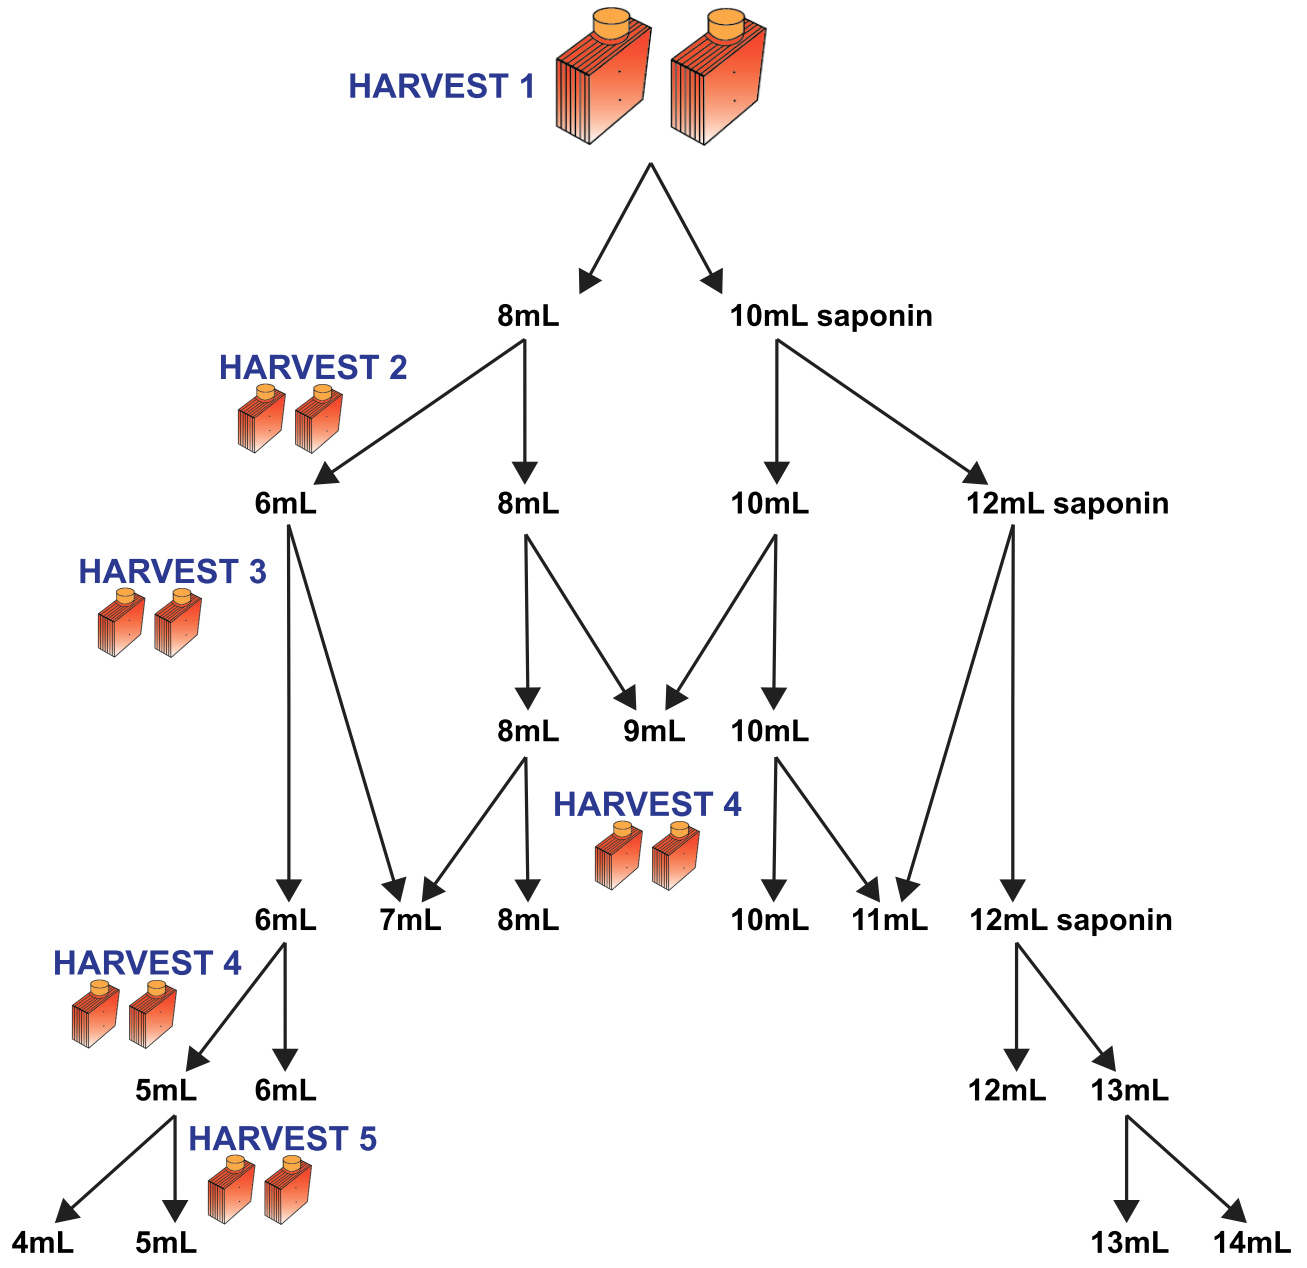

Supplement: MOESM2 [file 16336884]
